# Supplementary material for: Major discrepancy between factual antibiotic resistance and consumption in South of France: analysis of 539,037 bacterial strains
Source: PubMed Central journal article supplement (PMC7588456; doi:10.1038/s41598-020-75158-7), 2020-10-26
Supplement: 41598_2020_75158_MOESM1_ESM.pdf [file 41598_2020_75158_MOESM1_ESM.pdf]

**Full-length title:** Major discrepancy between factual antibiotic resistance and consumption in South of France: analysis of 539,037 bacterial strains.

**Author list:** Ousmane Oumou Diallo<sup>1,2</sup>, Sophie Alexandra Baron<sup>1,2</sup>, Gregory Dubourg<sup>1,2</sup>, Hervé Chaudet<sup>2,3</sup>, Philippe Halfon<sup>4</sup>, Sabine Camiade<sup>4</sup>, Béatrice Comte<sup>5</sup>, Stéphanie Joubert<sup>5</sup>, Arnaud François<sup>5</sup>, Philippe Seyral<sup>6</sup>, François Parisot<sup>6</sup>, Jean-Paul Casalta<sup>3,7</sup>, Raymond Ruimy<sup>8</sup>, Christophe Maruejols<sup>9</sup>, Jean-Christophe Achiardy<sup>9</sup>, Sophie Burignat<sup>10</sup>, Joseph Carvajal<sup>10</sup>, Edouard Delaunay<sup>10</sup>, Sandra Meyer<sup>10</sup>, Pierre-Yves Levy<sup>3,11</sup>, Patricia Roussellier<sup>12</sup>, Patrick Brunet<sup>13</sup>, Claude Bosi<sup>14</sup>, Philippe Stolidi<sup>14</sup>, Jean-Pierre Arzouni<sup>3,15</sup>, Gisele Gay<sup>15</sup>, Pierre Hance<sup>15</sup>, Philippe Colson<sup>1,2</sup>, Didier Raoult<sup>1,2\*</sup> and Jean-Marc Rolain<sup>1,2\*</sup>

**Affiliations:** <sup>1</sup> Aix Marseille Univ, IRD, APHM, MEPHI, Marseille, France, <sup>2</sup> MEPHI, Aix Marseille Université, IHU Méditerranée Infection, AP-HM, Marseille, <sup>3</sup> VITROME, Aix Marseille Université, IHU Méditerranée Infection, AP-HM, Marseille, <sup>4</sup>LBM Alphabio Marseille, <sup>5</sup>LBM Bioesterel, Cannes, <sup>6</sup>LBM Labazur Nice, <sup>7</sup>LBM Labazur Provence, <sup>8</sup>Laboratoire de bactériologie, CHU Nice, <sup>9</sup>LBM Barla, Nice, <sup>10</sup>LBM Cerballiance, Marseille, <sup>11</sup>LBM, Casamance, Aubagne, <sup>12</sup>Laboratoire de microbiologie, CH, Salon de Provence, <sup>13</sup>Laboratoire de microbiologie, CH Saint-Joseph, Marseille, <sup>14</sup>Laboratoire de microbiologie, CH, Aubagne, <sup>15</sup>LBM, Labosud Provence Biologie, Marseille

\* **Corresponding author :** Jean-Marc Rolain, Email: [jean-marc.rolain@univ-amu.fr](mailto:jean-marc.rolain@univ-amu.fr). Didier Raoult, Email: [didier.raoult@gmail.com](mailto:didier.raoult@gmail.com). Aix Marseille Univ, IRD, APHM, MEPHI, IHU Méditerranée Infection, Faculté de Médecine et de Pharmacie, 19-21 boulevard Jean Moulin, 13385 Marseille CEDEX 05, France. Phone: (33) 4 91 32 43 75.

Table S1. Presentation of the different bacterial species isolated from our surveillance

| Bacterial species                   | Number of strains |
|-------------------------------------|-------------------|
| <i>Escherichia coli</i>             | 284242            |
| <i>Staphylococcus aureus</i>        | 69070             |
| <i>Klebsiella pneumoniae</i>        | 54719             |
| <i>Enterococcus faecalis</i>        | 41158             |
| <i>Pseudomonas aeruginosa</i>       | 36911             |
| <i>Staphylococcus epidermidis</i>   | 29663             |
| <i>Proteus mirabilis</i>            | 20510             |
| <i>Enterobacter cloacae</i>         | 18477             |
| <i>Streptococcus agalactiae</i>     | 15809             |
| <i>Citrobacter koseri</i>           | 8658              |
| <i>Klebsiella oxytoca</i>           | 8650              |
| <i>Enterobacter aerogenes</i>       | 7689              |
| <i>Haemophilus influenzae</i>       | 7456              |
| <i>Staphylococcus saprophyticus</i> | 5512              |
| <i>Morganella morganii</i>          | 5386              |
| <i>Staphylococcus hominis</i>       | 5312              |
| <i>Enterococcus faecium</i>         | 5089              |
| <i>Staphylococcus haemolyticus</i>  | 4757              |
| <i>Serratia marcescens</i>          | 4684              |
| <i>Streptococcus pyogenes</i>       | 4078              |
| <i>Citrobacter freundii</i>         | 4022              |
| <i>Stenotrophomonas maltophilia</i> | 3395              |
| <i>Staphylococcus lugdunensis</i>   | 3171              |
| <i>Streptococcus pneumoniae</i>     | 2888              |
| <i>Staphylococcus capitis</i>       | 2757              |
| <i>Propionibacterium acnes</i>      | 2515              |
| <i>Streptococcus anginosus</i>      | 2232              |
| <i>Streptococcus constellatus</i>   | 1875              |
| <i>Corynebacterium striatum</i>     | 1847              |
| <i>Moraxella catarrhalis</i>        | 1839              |
| <i>Campylobacter jejuni</i>         | 1249              |
| <i>Proteus vulgaris</i>             | 1207              |
| <i>Bacteroides fragilis</i>         | 1198              |
| <i>Aerococcus urinae</i>            | 1197              |
| <i>Achromobacter xylosoxidans</i>   | 1181              |
| <i>Klebsiella variicola</i>         | 1179              |
| <i>Haemophilus parainfluenzae</i>   | 1171              |
| <i>Streptococcus mitis</i>          | 1165              |
| <i>Streptococcus dysgalactiae</i>   | 1153              |
| <i>Acinetobacter baumannii</i>      | 1123              |
| <i>Streptococcus oralis</i>         | 1090              |
| <i>Salmonella sp</i>                | 1087              |

|                                    |     |
|------------------------------------|-----|
| Hafnia alvei                       | 947 |
| Streptococcus gallolyticus         | 776 |
| Acinetobacter pittii               | 764 |
| Staphylococcus warneri             | 673 |
| Staphylococcus sp                  | 657 |
| Raoultella ornithinolytica         | 629 |
| Streptococcus sp                   | 600 |
| Pseudomonas putida                 | 561 |
| Micrococcus luteus                 | 551 |
| Providencia stuartii               | 545 |
| Streptococcus intermedius          | 497 |
| Corynebacterium amycolatum         | 438 |
| Neisseria gonorrhoeae              | 427 |
| Cutibacterium acnes                | 413 |
| Providencia rettgeri               | 402 |
| Pasteurella multocida              | 399 |
| Enterococcus avium                 | 391 |
| Clostridium difficile              | 384 |
| Staphylococcus simulans            | 382 |
| Finegoldia magna                   | 378 |
| Haemophilus haemolyticus           | 367 |
| Citrobacter braakii                | 358 |
| Bacillus cereus                    | 342 |
| Staphylococcus caprae              | 341 |
| Corynebacterium sp                 | 335 |
| Acinetobacter baumannii            | 327 |
| Streptococcus salivarius           | 321 |
| Turicella otitidis                 | 310 |
| Enterobacter kobei                 | 308 |
| Campylobacter coli                 | 278 |
| Pseudomonas sp                     | 278 |
| Propionibacterium avidum           | 271 |
| Actinotignum schaalii              | 267 |
| Enterobacter sp                    | 264 |
| Enterobacter asburiae              | 253 |
| Aeromonas hydrophila               | 250 |
| Corynebacterium glucuronolyticum   | 250 |
| Corynebacterium urealyticum        | 235 |
| Parvimonas micra                   | 231 |
| Streptococcus parasanguinis        | 222 |
| Bacteroides thetaiotaomicron       | 220 |
| Haemophilus parahaemolyticus       | 212 |
| Staphylococcus pasteurii           | 212 |
| Corynebacterium tuberculostearicum | 204 |

|                                      |     |
|--------------------------------------|-----|
| Actinomyces odontolyticus            | 203 |
| Corynebacterium jeikeium             | 189 |
| Actinomyces neuii                    | 187 |
| Enterococcus gallinarum              | 183 |
| Streptococcus sanguinis              | 182 |
| Acinetobacter ursingii               | 172 |
| Actinomyces turicensis               | 172 |
| Staphylococcus pettenkoferi          | 172 |
| Lactobacillus gasseri                | 170 |
| Corynebacterium pseudodiphtheriticum | 169 |
| Dermabacter hominis                  | 166 |
| Clostridium perfringens              | 162 |
| Aeromonas caviae                     | 160 |
| Citrobacter amalonaticus             | 156 |
| Peptoniphilus harei                  | 154 |
| Corynebacterium propinquum           | 153 |
| Aeromonas sp                         | 152 |
| Capnocytophaga sputigena             | 152 |
| Klebsiella aerogenes                 | 152 |
| Lactobacillus rhamnosus              | 151 |
| Acinetobacter sp                     | 147 |
| Enterococcus durans                  | 145 |
| Lactobacillus delbrueckii            | 143 |
| Prevotella bivia                     | 143 |
| Neisseria meningitidis               | 140 |
| Enterococcus casseliflavus           | 137 |
| Proteus hauseri                      | 129 |
| Acinetobacter junii                  | 127 |
| Yersinia enterocolitica              | 127 |
| Eikenella corrodens                  | 125 |
| Staphylococcus cohnii                | 125 |
| Staphylococcus pseudintermedius      | 125 |
| Citrobacter werkmanii                | 123 |
| Lactobacillus jensenii               | 123 |
| Pantoea agglomerans                  | 123 |
| Corynebacterium simulans             | 120 |
| Lactobacillus iners                  | 120 |
| Fusobacterium nucleatum              | 115 |
| Corynebacterium accolens             | 114 |
| Streptococcus gordonii               | 112 |
| Staphylococcus schleiferi            | 111 |
| Acinetobacter lwoffii                | 110 |
| Moraxella osloensis                  | 110 |
| Serratia liquefaciens                | 108 |

|                                       |     |
|---------------------------------------|-----|
| <i>Corynebacterium aurimucosum</i>    | 102 |
| <i>Actinomyces</i> sp                 | 100 |
| <i>Citrobacter</i> sp                 | 95  |
| <i>Bacteroides vulgatus</i>           | 94  |
| <i>Enterococcus</i> sp                | 94  |
| <i>Rothia mucilaginosa</i>            | 93  |
| <i>Pantoea</i> sp                     | 92  |
| <i>Aerococcus sanguinicola</i>        | 91  |
| <i>Salmonella enterica</i>            | 91  |
| <i>Enterococcus hirae</i>             | 90  |
| <i>Bacillus</i> sp                    | 89  |
| <i>Aeromonas veronii</i>              | 86  |
| <i>Eggerthella lenta</i>              | 84  |
| <i>Pasteurella canis</i>              | 83  |
| <i>Pseudomonas oryzihabitans</i>      | 83  |
| <i>Burkholderia multivorans</i>       | 80  |
| <i>Proteus penneri</i>                | 80  |
| <i>Moraxella nonliquefaciens</i>      | 79  |
| <i>Campylobacter fetus</i>            | 77  |
| <i>Achromobacter</i> sp               | 76  |
| <i>Alcaligenes faecalis</i>           | 75  |
| <i>Staphylococcus intermedius</i>     | 75  |
| <i>Bacteroides ovatus</i>             | 74  |
| <i>Raoultella planticola</i>          | 74  |
| <i>Delftia acidovorans</i>            | 72  |
| <i>Corynebacterium macginleyi</i>     | 69  |
| <i>Helicobacter pylori</i>            | 69  |
| <i>Streptococcus vestibularis</i>     | 69  |
| <i>Veillonella parvula</i>            | 68  |
| <i>Enterobacter ludwigii</i>          | 67  |
| <i>Pseudomonas stutzeri</i>           | 67  |
| <i>Actinomyces oris</i>               | 66  |
| <i>Cutibacterium avidum</i>           | 66  |
| <i>Neisseria flavescens</i>           | 62  |
| <i>Pseudomonas mosselii</i>           | 62  |
| <i>Shigella sonnei</i>                | 61  |
| <i>Aerococcus viridans</i>            | 60  |
| <i>Acinetobacter nosocomialis</i>     | 59  |
| <i>Citrobacter farmeri</i>            | 59  |
| <i>Propionibacterium</i>              | 59  |
| <i>Aggregatibacter aphrophilus</i>    | 57  |
| <i>Neisseria</i> sp                   | 56  |
| <i>Moraxella</i> sp                   | 54  |
| <i>Staphylococcus saccharolyticus</i> | 53  |

|                                           |    |
|-------------------------------------------|----|
| <i>Neisseria macacae</i>                  | 52 |
| <i>Clostridium tertium</i>                | 51 |
| <i>Enterobacter cancerogenus</i>          | 51 |
| <i>Fusobacterium necrophorum</i>          | 51 |
| <i>Kocuria rhizophila</i>                 | 50 |
| <i>Streptococcus lutetiensis</i>          | 50 |
| <i>Streptococcus pasteurianus</i>         | 50 |
| <i>Bacillus pumilus</i>                   | 49 |
| <i>Enterobacter hormaechei</i>            | 49 |
| <i>Citrobacter youngae</i>                | 48 |
| <i>Acinetobacter johnsonii</i>            | 47 |
| <i>Burkholderia cenocepacia</i>           | 47 |
| <i>Aggregatibacter segnis</i>             | 46 |
| <i>Leclercia adecarboxylata</i>           | 46 |
| <i>Propionibacterium granulorum</i>       | 46 |
| <i>Staphylococcus auricularis</i>         | 46 |
| <i>Pseudomonas monteilii</i>              | 45 |
| <i>Bacteroides uniformis</i>              | 44 |
| <i>Peptostreptococcus anaerobius</i>      | 43 |
| <i>Brevibacterium casei</i>               | 42 |
| <i>Peptoniphilus asaccharolyticus</i>     | 42 |
| <i>Streptococcus canis</i>                | 42 |
| <i>Acinetobacter radioresistens</i>       | 41 |
| <i>Pandoraea pulmonicola</i>              | 41 |
| <i>Aeromonas sobria</i>                   | 40 |
| <i>Escherichia hermannii</i>              | 40 |
| <i>Granulicatella adiacens</i>            | 40 |
| <i>Citrobacter sedlakii</i>               | 39 |
| <i>Corynebacterium coyleae</i>            | 39 |
| <i>Prevotella buccae</i>                  | 39 |
| <i>Lactobacillus</i> sp                   | 38 |
| <i>Actinomyces neuui</i> ssp <i>neuui</i> | 37 |
| <i>Actinomyces urogenitalis</i>           | 37 |
| <i>Lactococcus lactis</i>                 | 37 |
| <i>Streptococcus massiliensis</i>         | 37 |
| <i>Klebsiella</i> sp                      | 36 |
| <i>Listeria monocytogenes</i>             | 36 |
| <i>Roseomonas mucosa</i>                  | 36 |
| <i>Trueperella bernardiae</i>             | 36 |
| <i>Haemophilus</i> sp                     | 35 |
| <i>Ochrobactrum anthropi</i>              | 34 |
| <i>Parabacteroides distasonis</i>         | 34 |
| <i>Pseudomonas fluorescens</i>            | 34 |
| <i>Actinomyces radingae</i>               | 33 |

|                                |    |
|--------------------------------|----|
| Lactobacillus casei            | 32 |
| Actinomyces europaeus          | 31 |
| Sphingomonas paucimobilis      | 31 |
| Streptococcus mutans           | 31 |
| Aerococcus sp                  | 30 |
| Enterococcus raffinosus        | 30 |
| Gemella morbillorum            | 30 |
| Shigella sp                    | 30 |
| Streptococcus pseudopneumoniae | 30 |
| Achromobacter denitrificans    | 29 |
| Bacteroides sp                 | 29 |
| Erysipelatoclostridium ramosum | 29 |
| Nocardia sp                    | 29 |
| Achromobacter insolitus        | 28 |
| Prevotella denticola           | 28 |
| Pseudomonas mendocina          | 28 |
| Abiotrophia defectiva          | 27 |
| Clostridium clostridioforme    | 27 |
| Corynebacterium minutissimum   | 27 |
| Moraxella lacunata             | 27 |
| Proteus sp                     | 27 |
| Streptococcus australis        | 27 |
| Chryseobacterium gleum         | 26 |
| Rhizobium radiobacter          | 26 |
| Rothia dentocariosa            | 26 |
| Staphylococcus petrasii        | 26 |
| Acinetobacter haemolyticus     | 25 |
| Bacteroides pyogenes           | 25 |
| Kocuria sp                     | 25 |
| Lactobacillus paracasei        | 25 |
| Prevotella intermedia          | 25 |
| Staphylococcus xylosus         | 25 |
| Agrobacterium tumefaciens      | 24 |
| Gemella haemolysans            | 24 |
| Streptococcus equinus          | 24 |
| Bordetella bronchiseptica      | 23 |
| Pantoea septica                | 23 |
| Acinetobacter septicus         | 22 |
| Arcanobacterium haemolyticum   | 22 |
| Bacteroides caccae             | 22 |
| Chryseobacterium indologenes   | 22 |
| Pseudomonas luteola            | 22 |
| Staphylococcus condimentii     | 22 |
| Streptococcus cristatus        | 22 |

|                                 |    |
|---------------------------------|----|
| Burkholderia cepacia            | 21 |
| Cronobacter sakazakii           | 21 |
| Escherichia vulneris            | 21 |
| Prevotella sp                   | 21 |
| Pseudomonas fulva               | 21 |
| Lactobacillus fermentum         | 20 |
| Prevotella melaninogenica       | 20 |
| Acinetobacter calcoaceticus     | 19 |
| Clostridium ramosum             | 19 |
| Clostridium septicum            | 19 |
| Corynebacterium afermentans     | 19 |
| Elizabethkingia meningoseptica  | 19 |
| Fusobacterium sp                | 19 |
| Pasteurella sp                  | 19 |
| Anaerococcus vaginalis          | 18 |
| Paenibacillus sp                | 18 |
| Pasteurella stomatis            | 18 |
| Pseudoglutamicibacter cumminsii | 18 |
| Serratia rubidaea               | 18 |
| Streptococcus thermophilus      | 18 |
| Alloscardovia omnicolens        | 17 |
| Brevundimonas diminuta          | 17 |
| Capnocytophaga sp               | 17 |
| Dolosigranulum pigrum           | 17 |
| Kocuria kristinae               | 17 |
| Microbacterium sp               | 17 |
| Oligella urethralis             | 17 |
| Pseudomonas plecoglossicida     | 17 |
| Serratia sp                     | 17 |
| Shigella flexneri               | 17 |
| Bacillus subtilis               | 16 |
| Campylobacter sp                | 16 |
| Lactococcus garvieae            | 16 |
| Pantoea dispersa                | 16 |
| Pasteurella dagmatis            | 16 |
| Raoultella sp                   | 16 |
| Shewanella putrefaciens         | 16 |
| Streptococcus infantarius       | 16 |
| Arthrobacter sp                 | 15 |
| Bacillus simplex                | 15 |
| Bifidobacterium breve           | 15 |
| Burkholderia gladioli           | 15 |
| Clostridium innocuum            | 15 |
| Dialister pneumosintes          | 15 |



|                                     |    |
|-------------------------------------|----|
| <i>Kluyvera ascorbata</i>           | 15 |
| <i>Lactobacillus salivarius</i>     | 15 |
| <i>Neisseria subflava</i>           | 15 |
| <i>Peptoniphilus</i> sp             | 15 |
| <i>Staphylococcus sciuri</i>        | 15 |
| <i>Atopobium parvulum</i>           | 14 |
| <i>Haemophilus sputorum</i>         | 14 |
| <i>Lactobacillus johnsonii</i>      | 14 |
| <i>Vibrio alginolyticus</i>         | 14 |
| <i>Actinomyces naeslundii</i>       | 13 |
| <i>Fusobacterium naviforme</i>      | 13 |
| <i>Pantoea calida</i>               | 13 |
| <i>Prevotella disiens</i>           | 13 |
| <i>Veillonella atypica</i>          | 13 |
| <i>Fusobacterium gonidiaformans</i> | 12 |
| <i>Kingella kingae</i>              | 12 |
| <i>Lelliottia amnigena</i>          | 12 |
| <i>Prevotella oris</i>              | 12 |
| <i>Salmonella typhimurium</i>       | 12 |
| <i>Serratia ureilytica</i>          | 12 |
| <i>Actinomyces meyeri</i>           | 11 |
| <i>Arcobacter butzleri</i>          | 11 |
| <i>Bacillus megaterium</i>          | 11 |
| <i>Burkholderia</i> sp              | 11 |
| <i>Clostridium</i> sp               | 11 |
| <i>Corynebacterium bovis</i>        | 11 |
| <i>Pandoraea sputorum</i>           | 11 |
| <i>Roseomonas</i> sp                | 11 |
| <i>Staphylococcus equorum</i>       | 11 |
| <i>Acinetobacter bereziniae</i>     | 10 |
| <i>Anaerococcus octavius</i>        | 10 |
| <i>Bacillus circulans</i>           | 10 |
| <i>Bacillus thuringiensis</i>       | 10 |
| <i>Bacteroides faecis</i>           | 10 |
| <i>Chryseobacterium</i> sp          | 10 |
| <i>Clostridium sordellii</i>        | 10 |
| <i>Cutibacterium granulosum</i>     | 10 |
| <i>Helcococcus kunzii</i>           | 10 |
| <i>Lactobacillus crispatus</i>      | 10 |
| <i>Ochrobactrum intermedium</i>     | 10 |
| <i>Paracoccus yeei</i>              | 10 |
| <i>Actinomyces ihumii</i>           | 9  |
| <i>Actinomyces viscosus</i>         | 9  |
| <i>Actinotignum sanguinis</i>       | 9  |

|                                |   |
|--------------------------------|---|
| Bacillus licheniformis         | 9 |
| Clostridium sphenoides         | 9 |
| Clostridium sporogenes         | 9 |
| Corynebacterium imitans        | 9 |
| Corynebacterium kroppenstedtii | 9 |
| Pseudomonas alcaligenes        | 9 |
| Serratia odorifera             | 9 |
| Staphylococcus carnosus        | 9 |
| Streptococcus equisimilis      | 9 |
| Acinetobacter schindleri       | 8 |
| Aggregatibacter sp             | 8 |
| Bifidobacterium sp             | 8 |
| Bordetella spp                 | 8 |
| Clostridium paraputrificum     | 8 |
| Comamonas testosteroni         | 8 |
| Corynebacterium argedoratense  | 8 |
| Corynebacterium mucifaciens    | 8 |
| Ewingella americana            | 8 |
| Haemophilus pittmaniae         | 8 |
| Kluyvera cryocrescens          | 8 |
| Nocardia farcinica             | 8 |
| Ochrobactrum sp                | 8 |
| Peptoniphilus gorbachii        | 8 |
| Pluralibacter gergoviae        | 8 |
| Prevotella nigrescens          | 8 |
| Pseudomonas koreensis          | 8 |
| Rothia sp                      | 8 |
| Serratia ficaria               | 8 |
| Sphingomonas sp                | 8 |
| Veillonella sp                 | 8 |
| Vibrio parahaemolyticus        | 8 |
| Atopobium vaginae              | 7 |
| Bifidobacterium longum         | 7 |
| Brevibacterium sp              | 7 |
| Corynebacterium diphtheriae    | 7 |
| Fusobacterium varium           | 7 |
| Gemella sp                     | 7 |
| Lactobacillus acidophilus      | 7 |
| Leptotrichia buccalis          | 7 |
| Microbacterium paraoxydans     | 7 |
| Neisseria mucosa               | 7 |
| Porphyromonas somerae          | 7 |
| Raoultella terrigena           | 7 |
| Ruminococcus gnavus            | 7 |

|                                    |   |
|------------------------------------|---|
| Serratia fonticola                 | 7 |
| Stenotrophomonas sp                | 7 |
| Actinobaculum massiliense          | 6 |
| Arcobacter cryaerophilus           | 6 |
| Capnocytophaga gingivalis          | 6 |
| Corynebacterium auris              | 6 |
| Corynebacterium confusum           | 6 |
| Lactobacillus plantarum            | 6 |
| Leuconostoc lactis                 | 6 |
| Neisseria weaveri                  | 6 |
| Nocardia abscessus                 | 6 |
| Pasteurella bettyae                | 6 |
| Peptostreptococcus sp              | 6 |
| Plesiomonas shigelloides           | 6 |
| Prevotella baroniae                | 6 |
| Prevotella loescheii               | 6 |
| Pseudomonas otitidis               | 6 |
| Rahnella aquatilis                 | 6 |
| Salmonella enteritidis             | 6 |
| Solobacterium moorei               | 6 |
| Streptococcus equi                 | 6 |
| Streptococcus porcinus             | 6 |
| Streptococcus zooepidemicus        | 6 |
| Acinetobacter guillouiae           | 5 |
| Actinobaculum sp                   | 5 |
| Actinomyces israelii               | 5 |
| Actinomyces turicensis             | 5 |
| Anaerococcus sp                    | 5 |
| Bacteroides cellulosilyticus       | 5 |
| Bifidobacterium bifidum            | 5 |
| Capnocytophaga ochracea            | 5 |
| Comamonas kerstersii               | 5 |
| Corynebacterium pseudotuberculosis | 5 |
| Delftia sp                         | 5 |
| Elizabethkingia miricola           | 5 |
| Facklamia hominis                  | 5 |
| Kocuria varians                    | 5 |
| Leuconostoc mesenteroides          | 5 |
| Listeria sp                        | 5 |
| Lysinibacillus fusiformis          | 5 |
| Prevotella oralis                  | 5 |
| Rhizobium sp                       | 5 |
| Roseomonas gilardii                | 5 |
| Serratia proteamaculans            | 5 |

|                                       |   |
|---------------------------------------|---|
| Shewanella algae                      | 5 |
| Shigella boydii                       | 5 |
| Slackia exigua                        | 5 |
| Staphylococcus piscifermentans        | 5 |
| Acinetobacter parvus                  | 4 |
| Actinobacillus sp                     | 4 |
| Actinomyces graevenitzii              | 4 |
| Actinotignum sp                       | 4 |
| Aggregatibacter actinomycetemcomitans | 4 |
| Atopobium rimae                       | 4 |
| Bacillus mycoides                     | 4 |
| Bacteroides stercoris                 | 4 |
| Bifidobacterium scardovii             | 4 |
| Branhamella sp                        | 4 |
| Brevibacterium celere                 | 4 |
| Brevibacterium luteolum               | 4 |
| Brevibacterium paucivorans            | 4 |
| Comamonas sp                          | 4 |
| Corynebacterium ihumii                | 4 |
| Corynebacterium ulcerans              | 4 |
| Delftia tsuruhatensis                 | 4 |
| Dialister micraerophilus              | 4 |
| Empedobacter brevis                   | 4 |
| Empedobacter falsenii                 | 4 |
| Erysipelothrix rhusiopathiae          | 4 |
| Gemella sanguinis                     | 4 |
| Granulicatella elegans                | 4 |
| Hungatella hathewayi                  | 4 |
| Kocuria palustris                     | 4 |
| Kytococcus schroeteri                 | 4 |
| Lactobacillus sakei                   | 4 |
| Leptotrichia sp                       | 4 |
| Leptotrichia trevisanii               | 4 |
| Leuconostoc sp                        | 4 |
| Macrococcus caseolyticus              | 4 |
| Micrococcus sp                        | 4 |
| Neisseria elongata                    | 4 |
| Pediococcus pentosaceus               | 4 |
| Peptococcus sp                        | 4 |
| Prevotella nanceiensis                | 4 |
| Propionibacterium sp                  | 4 |
| Serratia plymuthica                   | 4 |
| Shigella dysenteriae                  | 4 |
| Staphylococcus urealyticus            | 4 |

|                                                |   |
|------------------------------------------------|---|
| <i>Streptococcus</i> <i>urinalis</i>           | 4 |
| <i>Actinomyces</i> <i>grossensis</i>           | 3 |
| <i>Anaerococcus</i> <i>murdochii</i>           | 3 |
| <i>Bacillus</i> <i>vallismortis</i>            | 3 |
| <i>Bergeyella</i> <i>zoohelcum</i>             | 3 |
| <i>Bordetella</i> <i>petrii</i>                | 3 |
| <i>Brevundimonas</i> <i>aurantiaca</i>         | 3 |
| <i>Brevundimonas</i> <i>vesicularis</i>        | 3 |
| <i>Brucella</i> <i>sp</i>                      | 3 |
| <i>Burkholderia</i> <i>pseudomallei</i>        | 3 |
| <i>Campylobacter</i> <i>upsaliensis</i>        | 3 |
| <i>Clostridium</i> <i>bifermentans</i>         | 3 |
| <i>Clostridium</i> <i>subterminale</i>         | 3 |
| <i>Corynebacterium</i> <i>lascolaensis</i>     | 3 |
| <i>Corynebacterium</i> <i>singulare</i>        | 3 |
| <i>Corynebacterium</i> <i>ureicelerivorans</i> | 3 |
| <i>Cupriavidus</i> <i>respiraculi</i>          | 3 |
| <i>Dermabacter</i> <i>sp</i>                   | 3 |
| <i>Eggerthella</i> <i>sp</i>                   | 3 |
| <i>Enterococcus</i> <i>malodoratus</i>         | 3 |
| <i>Escherichia</i> <i>fergusonii</i>           | 3 |
| <i>Facklamia</i> <i>languida</i>               | 3 |
| <i>Fusobacterium</i> <i>mortiferum</i>         | 3 |
| <i>Granulicatella</i> <i>sp</i>                | 3 |
| <i>Inquilinus</i> <i>limosus</i>               | 3 |
| <i>Kluyvera</i> <i>intermedia</i>              | 3 |
| <i>Kosakonia</i> <i>cowanii</i>                | 3 |
| <i>Microbacterium</i> <i>oxydans</i>           | 3 |
| <i>Micrococcus</i> <i>lylae</i>                | 3 |
| <i>Myroides</i> <i>sp</i>                      | 3 |
| <i>Neisseria</i> <i>lactamica</i>              | 3 |
| <i>Nocardia</i> <i>cyriacigeorgica</i>         | 3 |
| <i>Parabacteroides</i> <i>goldsteinii</i>      | 3 |
| <i>Prevotella</i> <i>conceptionensis</i>       | 3 |
| <i>Prevotella</i> <i>corporis</i>              | 3 |
| <i>Providencia</i> <i>alcalifaciens</i>        | 3 |
| <i>Providencia</i> <i>sp</i>                   | 3 |
| <i>Pseudomonas</i> <i>massiliensis</i>         | 3 |
| <i>Staphylococcus</i> <i>gallinarum</i>        | 3 |
| <i>Streptococcus</i> <i>minor</i>              | 3 |
| <i>Sutterella</i> <i>sp</i>                    | 3 |
| <i>Vagococcus</i> <i>fluvialis</i>             | 3 |
| <i>Weeksella</i> <i>virosa</i>                 | 3 |
| <i>Weissella</i> <i>confusa</i>                | 3 |

|                               |   |
|-------------------------------|---|
| Weissella viridescens         | 3 |
| Yersinia sp                   | 3 |
| Achromobacter ruhlandii       | 2 |
| Aeromonas jandaei             | 2 |
| Aeromonas media               | 2 |
| Alistipes finegoldii          | 2 |
| Anaerococcus lactolyticus     | 2 |
| Anaerococcus prevotii         | 2 |
| Anaerococcus tetradius        | 2 |
| Arcanobacterium sp            | 2 |
| Arcobacter sp                 | 2 |
| Aureimonas altamirensis       | 2 |
| Bacillus altitudinis          | 2 |
| Bacillus amyloliquefaciens    | 2 |
| Bacillus vietnamensis         | 2 |
| Bacillus weihenstephanensis   | 2 |
| Bacteroides heparinolyticus   | 2 |
| Bifidobacterium dentium       | 2 |
| Bordetella hinzii             | 2 |
| Brevibacterium ravensturgense | 2 |
| Brevundimonas sp              | 2 |
| Budvicia aquatica             | 2 |
| Cellulosimicrobium cellulans  | 2 |
| Clostridium baratii           | 2 |
| Collinsella aerofaciens       | 2 |
| Coprobacillus sp              | 2 |
| Corynebacterium freneyi       | 2 |
| Corynebacterium riegelii      | 2 |
| Corynebacterium xerosis       | 2 |
| Cupriavidus gilardii          | 2 |
| Eikenella sp                  | 2 |
| Enterobacter amnigenus        | 2 |
| Erwinia sp                    | 2 |
| Escherichia sp                | 2 |
| Exiguobacterium               | 2 |
| Flavobacterium sp             | 2 |
| Flavonifractor plautii        | 2 |
| Gordona bronchialis           | 2 |
| Gordonia sp                   | 2 |
| Ignavigranum ruoffiae         | 2 |
| Janibacter hoylei             | 2 |
| Kerstersia gyiorum            | 2 |
| Kluyvera georgiana            | 2 |
| Lactococcus sp                | 2 |

|                                            |   |
|--------------------------------------------|---|
| <i>Leuconostoc citreum</i>                 | 2 |
| <i>Listeria ivanovii</i>                   | 2 |
| <i>Microbacterium kitamiense</i>           | 2 |
| <i>Neisseria animaloris</i>                | 2 |
| <i>Neisseria canis</i>                     | 2 |
| <i>Neisseria cinerea</i>                   | 2 |
| <i>Neisseria flava</i>                     | 2 |
| <i>Nocardia nova</i>                       | 2 |
| <i>Paracoccus</i> sp                       | 2 |
| <i>Pediococcus</i> sp                      | 2 |
| <i>Peptoniphilus grossensis</i>            | 2 |
| <i>Porphyromonas asaccharolytica</i>       | 2 |
| <i>Porphyromonas gingivalis</i>            | 2 |
| <i>Prevotella buccalis</i>                 | 2 |
| <i>Pseudomonas citronellolis</i>           | 2 |
| <i>Pseudomonas oleovorans</i>              | 2 |
| <i>Pseudopropionibacterium propionicum</i> | 2 |
| <i>Ralstonia</i> sp                        | 2 |
| <i>Sphingobacterium multivorum</i>         | 2 |
| <i>Staphylococcus felis</i>                | 2 |
| <i>Staphylococcus kloosii</i>              | 2 |
| <i>Streptococcus castoreus</i>             | 2 |
| <i>Streptococcus infantis</i>              | 2 |
| <i>Streptococcus peroris</i>               | 2 |
| <i>Streptococcus uberis</i>                | 2 |
| <i>Tissierella praeacuta</i>               | 2 |
| <i>Veillonella dispar</i>                  | 2 |
| <i>Weissella</i> sp                        | 2 |
| <i>Yersinia pseudotuberculosis</i>         | 2 |
| <i>Acidovorax temperans</i>                | 1 |
| <i>Actinobacillus pleuropneumoniae</i>     | 1 |
| <i>Actinomyces bowdenii</i>                | 1 |
| <i>Actinomyces dentalis</i>                | 1 |
| <i>Actinomyces georgiae</i>                | 1 |
| <i>Actinomyces radidentis</i>              | 1 |
| <i>Aeromonas bestiarum</i>                 | 1 |
| <i>Aeromonas encheleia</i>                 | 1 |
| <i>Aeromonas salmonicida</i>               | 1 |
| <i>Akkermansia muciniphila</i>             | 1 |
| <i>Alcaligenes</i> sp                      | 1 |
| <i>Alloiococcus otitis</i>                 | 1 |
| <i>Anaerococcus hydrogenalis</i>           | 1 |
| <i>Anaerotruncus colihominis</i>           | 1 |
| <i>Bacillus badius</i>                     | 1 |

|                               |   |
|-------------------------------|---|
| Bacillus clausii              | 1 |
| Bacillus firmus               | 1 |
| Bacillus horneckiae           | 1 |
| Bacillus infantis             | 1 |
| Bacillus marisflavi           | 1 |
| Bacteroides massiliensis      | 1 |
| Bacteroides nordii            | 1 |
| Bacteroides salyersiae        | 1 |
| Bergeyella sp                 | 1 |
| Bordetella trematum           | 1 |
| Brevibacillus agri            | 1 |
| Brevibacillus parabrevis      | 1 |
| Brevibacterium massiliense    | 1 |
| Brucella melitensis           | 1 |
| Burkholderia stabilis         | 1 |
| Butyricimonas phoceensis      | 1 |
| Butyricimonas virosa          | 1 |
| Campylobacter lari            | 1 |
| Campylobacter rectus          | 1 |
| Campylobacter sputorum        | 1 |
| Capnocytophaga canimorsus     | 1 |
| Capnocytophaga granulosa      | 1 |
| Carnobacterium divergens      | 1 |
| Carnobacterium maltaromaticum | 1 |
| Cellulomonas sp               | 1 |
| Chryseobacterium hominis      | 1 |
| Citrobacter gillenii          | 1 |
| Citrobacter murlinae          | 1 |
| Clostridium aldenense         | 1 |
| Clostridium butyricum         | 1 |
| Clostridium cadaveris         | 1 |
| Clostridium celerecrescens    | 1 |
| Clostridium tetani            | 1 |
| Corynebacterium auriscanis    | 1 |
| Corynebacterium durum         | 1 |
| Corynebacterium glutamicum    | 1 |
| Corynebacterium hansenii      | 1 |
| Corynebacterium lipophile     | 1 |
| Corynebacterium pilosum       | 1 |
| Cupriavidus sp                | 1 |
| Desulfovibrio desulfuricans   | 1 |
| Dialister sp                  | 1 |
| Dietzia cinnamomea            | 1 |
| Dietzia natronolimnaea        | 1 |



|                                       |   |
|---------------------------------------|---|
| <i>Enterococcus devriesei</i>         | 1 |
| <i>Enterococcus mundtii</i>           | 1 |
| <i>Erwinia persicina</i>              | 1 |
| <i>Eubacterium limosum</i>            | 1 |
| <i>Fusobacterium canifelinum</i>      | 1 |
| <i>Fusobacterium periodonticum</i>    | 1 |
| <i>Gardnerella vaginalis</i>          | 1 |
| <i>Gemella bergeri</i>                | 1 |
| <i>Gordonia bronchialis</i>           | 1 |
| <i>Haemophilus haemoglobinophilus</i> | 1 |
| <i>Haemophilus parasuis</i>           | 1 |
| <i>Helcococcus sueciensis</i>         | 1 |
| <i>Janibacter sanguinis</i>           | 1 |
| <i>Kingella</i> sp                    | 1 |
| <i>Kluyvera</i> sp                    | 1 |
| <i>Kytococcus sedentarius</i>         | 1 |
| <i>Lactobacillus mucosae</i>          | 1 |
| <i>Lactobacillus murinus</i>          | 1 |
| <i>Lactobacillus reuteri</i>          | 1 |
| <i>Lactobacillus vaginalis</i>        | 1 |
| <i>Lysinibacillus massiliensis</i>    | 1 |
| <i>Massilia timonae</i>               | 1 |
| <i>Microbacterium aurum</i>           | 1 |
| <i>Microbacterium flavescens</i>      | 1 |
| <i>Microbacterium lacticum</i>        | 1 |
| <i>Micrococcus flavus</i>             | 1 |
| <i>Moraxella atlantae</i>             | 1 |
| <i>Moraxella lincolnii</i>            | 1 |
| <i>Morganella</i> sp                  | 1 |
| <i>Mycobacterium abscessus</i>        | 1 |
| <i>Mycobacterium avium</i>            | 1 |
| <i>Mycobacterium chelonae</i>         | 1 |
| <i>Mycobacterium</i> sp               | 1 |
| <i>Myroides odoratimimus</i>          | 1 |
| <i>Neisseria zoodegmatis</i>          | 1 |
| <i>Nocardia wallacei</i>              | 1 |
| <i>Olsenella</i> sp                   | 1 |
| <i>Paenibacillus amylolyticus</i>     | 1 |
| <i>Paenibacillus durus</i>            | 1 |
| <i>Paenibacillus lactis</i>           | 1 |
| <i>Paenibacillus pabuli</i>           | 1 |
| <i>Paenibacillus provencensis</i>     | 1 |
| <i>Paenibacillus urinalis</i>         | 1 |
| <i>Pantoea annanatis</i>              | 1 |

|                                         |   |
|-----------------------------------------|---|
| <i>Parabacteroides merdae</i>           | 1 |
| <i>Pediococcus acidilactici</i>         | 1 |
| <i>Peptoniphilus indolicus</i>          | 1 |
| <i>Peptoniphilus olsenii</i>            | 1 |
| <i>Peptoniphilus tyrrelliae</i>         | 1 |
| <i>Peptostreptococcus stomatis</i>      | 1 |
| <i>Photobacterium damsela</i>           | 1 |
| <i>Porphyromonas</i> sp                 | 1 |
| <i>Prevotella bergensis</i>             | 1 |
| <i>Prevotella dentalis</i>              | 1 |
| <i>Prevotella massiliensis</i>          | 1 |
| <i>Prevotella oulorum</i>               | 1 |
| <i>Prevotella pallens</i>               | 1 |
| <i>Prevotella timonensis</i>            | 1 |
| <i>Prevotella veroralis</i>             | 1 |
| <i>Propionibacterium propionicum</i>    | 1 |
| <i>Propionimicrobium lymphophilum</i>   | 1 |
| <i>Pseudomonas agarici</i>              | 1 |
| <i>Pseudomonas kuykendallii</i>         | 1 |
| <i>Pseudomonas libanensis</i>           | 1 |
| <i>Pseudomonas pseudoalcaligenes</i>    | 1 |
| <i>Pseudomonas synxantha</i>            | 1 |
| <i>Rhodococcus equi</i>                 | 1 |
| <i>Rhodococcus erythropolis</i>         | 1 |
| <i>Rhodococcus rhodochrous</i>          | 1 |
| <i>Rhodococcus</i> sp                   | 1 |
| <i>Rodentibacter pneumotropicus</i>     | 1 |
| <i>Roseomonas genomospecies</i>         | 1 |
| <i>Rothia terrae</i>                    | 1 |
| <i>Serratia grimesii</i>                | 1 |
| <i>Sphingobacterium</i> sp              | 1 |
| <i>Sphingobacterium spiritivorum</i>    | 1 |
| <i>Sphingopyxis</i> sp                  | 1 |
| <i>Sporolactobacillus laevolacticus</i> | 1 |
| <i>Sporosarcina luteola</i>             | 1 |
| <i>Staphylococcus arlettae</i>          | 1 |
| <i>Staphylococcus delphini</i>          | 1 |
| <i>Staphylococcus succinus</i>          | 1 |
| <i>Stenotrophomonas acidaminiphila</i>  | 1 |
| <i>Stenotrophomonas rhizophila</i>      | 1 |
| <i>Streptococcus alactolyticus</i>      | 1 |
| <i>Streptococcus ovis</i>               | 1 |
| <i>Streptococcus pseudoporcinus</i>     | 1 |
| <i>Streptococcus sobrinus</i>           | 1 |

|                                    |        |
|------------------------------------|--------|
| <i>Sutterella wadsworthensis</i>   | 1      |
| <i>Terrisporobacter glycolicus</i> | 1      |
| <i>Turicibacter sanguinis</i>      | 1      |
| <i>Vagococcus</i> sp               | 1      |
| <i>Vibrio cholerae</i>             | 1      |
| <i>Vibrio fluvialis</i>            | 1      |
| <i>Vibrio vulnificus</i>           | 1      |
| <i>Wautersiella falsenii</i>       | 1      |
| <i>Yersinia frederiksenii</i>      | 1      |
| <i>Yersinia intermedia</i>         | 1      |
| <i>Yersinia kristensenii</i>       | 1      |
| <i>Yokenella regensburgei</i>      | 1      |
| Total                              | 711032 |

: system from January 2014 to February 2019 (N=711,031).

Table S2: Trend in antibiotic resistance of the species studied for the full years 2014 to 2018.

| <i>Escherichia coli</i>  |        |        |       |        |        |       |        |        |       |        |        |       |        |        |       |
|--------------------------|--------|--------|-------|--------|--------|-------|--------|--------|-------|--------|--------|-------|--------|--------|-------|
|                          | 2014   |        |       | 2015   |        |       | 2016   |        |       | 2017   |        |       | 2018   |        |       |
|                          | R      | N      | %     | R      | N      | %     | R      | N      | %     | R      | N      | %     | R      | N      | %     |
| CRO                      | 2,046  | 21,067 | 9.71  | 2,882  | 25,808 | 11.17 | 5,026  | 50,968 | 9.86  | 6,554  | 74,218 | 8.83  | 7,551  | 84,657 | 8.92  |
| AMX                      | 13,380 | 22,770 | 58.76 | 15,651 | 27,344 | 57.24 | 25,510 | 52,005 | 49.05 | 37,087 | 76,370 | 48.56 | 41,266 | 85,446 | 48.29 |
| AMC                      | 9,052  | 22,794 | 39.71 | 9821   | 25,420 | 38.63 | 10,061 | 42,299 | 23.79 | 14,160 | 67,295 | 21.04 | 14,347 | 66,259 | 21.65 |
| CIP                      | 4,135  | 22,801 | 18.14 | 4,775  | 27,288 | 17.50 | 6,797  | 43,957 | 15.46 | 12,005 | 76,217 | 15.75 | 8,492  | 67,992 | 12.49 |
| IPM                      | 18     | 16,693 | 0.11  | 23     | 17,532 | 0.13  | 38     | 17,696 | 0.21  | 27     | 26,242 | 0.10  | 72     | 28,767 | 0.25  |
| AN                       | 792    | 16,733 | 4.73  | 540    | 21,303 | 2.53  | 1,743  | 46,367 | 3.76  | 1,791  | 70,734 | 2.53  | 1,105  | 80,977 | 1.36  |
| <i>Proteus mirabilis</i> |        |        |       |        |        |       |        |        |       |        |        |       |        |        |       |
| AMX                      | 867    | 2,025  | 42.81 | 856    | 2,145  | 39.91 | 1,462  | 3,639  | 40.18 | 2,092  | 5,328  | 39.26 | 2,485  | 5,966  | 41.65 |
| AMC                      | 382    | 2,027  | 18.85 | 334    | 2,034  | 16.42 | 298    | 3,056  | 9.75  | 391    | 4,805  | 8.14  | 363    | 4,798  | 7.57  |
| CRO                      | 41     | 1,880  | 2.18  | 56     | 2,007  | 2.79  | 65     | 3,464  | 1.88  | 91     | 5,065  | 1.80  | 88     | 5,749  | 1.53  |
| CIP                      | 260    | 2,030  | 12.81 | 251    | 2,139  | 11.73 | 416    | 3,241  | 12.84 | 702    | 5,318  | 13.20 | 527    | 4,895  | 10.77 |
| IPM                      | 18     | 1,615  | 1.11  | 28     | 1,518  | 1.84  | 26     | 1,512  | 1.72  | 37     | 1,629  | 2.27  | 74     | 1,471  | 5.03  |

|                               |       |       |       |       |       |       |       |       |       |       |        |       |       |        |       |
|-------------------------------|-------|-------|-------|-------|-------|-------|-------|-------|-------|-------|--------|-------|-------|--------|-------|
| AN                            | 76    | 1,390 | 5.47  | 34    | 1,595 | 2.13  | 106   | 3,033 | 3.49  | 129   | 4,749  | 2.72  | 55    | 5,435  | 1.01  |
| <i>Enterobacter aerogenes</i> |       |       |       |       |       |       |       |       |       |       |        |       |       |        |       |
| CRO                           | 38    | 389   | 9.77  | 53    | 446   | 11.88 | 137   | 875   | 15.66 | 212   | 1,240  | 17.10 | 307   | 1,470  | 20.88 |
| IPM                           | 11    | 770   | 1.43  | 16    | 827   | 1.93  | 13    | 897   | 1.45  | 17    | 994    | 1.71  | 9     | 1,042  | 0.86  |
| CIP                           | 154   | 861   | 17.89 | 215   | 995   | 21.61 | 249   | 1,340 | 18.58 | 184   | 1,833  | 10.04 | 165   | 1,731  | 9.53  |
| AN                            | 38    | 570   | 6.67  | 52    | 733   | 7.09  | 63    | 1,216 | 5.18  | 44    | 1,594  | 2.76  | 44    | 1,823  | 2.41  |
| <i>Enterobacter cloacae</i>   |       |       |       |       |       |       |       |       |       |       |        |       |       |        |       |
| CRO                           | 187   | 861   | 21.72 | 158   | 768   | 20.57 | 404   | 1,343 | 30.08 | 660   | 1,887  | 34.98 | 1,305 | 2,746  | 47.52 |
| IPM                           | 12    | 1,805 | 0.66  | 14    | 1,869 | 0.75  | 20    | 2,025 | 0.99  | 21    | 2,460  | 0.85  | 43    | 3,163  | 1.36  |
| CIP                           | 681   | 1,915 | 35.56 | 577   | 1,943 | 29.70 | 734   | 2,367 | 31.01 | 1,146 | 3,319  | 34.53 | 1,279 | 3,853  | 33.19 |
| AN                            | 69    | 1,164 | 5.93  | 37    | 1,319 | 2.81  | 55    | 1,896 | 2.90  | 104   | 2,670  | 3.90  | 176   | 3,780  | 4.66  |
| <i>Klebsiella pneumoniae</i>  |       |       |       |       |       |       |       |       |       |       |        |       |       |        |       |
| CRO                           | 1,178 | 4,400 | 26.77 | 1,605 | 5,469 | 29.35 | 2,377 | 8,900 | 26.71 | 3,000 | 12,122 | 24.75 | 3,413 | 14,413 | 23.68 |
| CIP                           | 1,815 | 5,289 | 34.32 | 2,117 | 6,208 | 34.10 | 2,847 | 8,819 | 32.28 | 3,896 | 13,426 | 29.02 | 2,751 | 12,099 | 22.74 |
| IPM                           | 66    | 4,516 | 1.46  | 94    | 4,901 | 1.92  | 108   | 5,545 | 1.95  | 98    | 7,067  | 1.39  | 173   | 7,223  | 2.40  |
| AN                            | 363   | 3,963 | 9.16  | 380   | 4,935 | 7.70  | 470   | 8,440 | 5.57  | 579   | 12,156 | 4.76  | 448   | 13,804 | 3.25  |
| <i>Klebsiella oxytoca</i>     |       |       |       |       |       |       |       |       |       |       |        |       |       |        |       |

|                                |       |       |       |       |       |       |       |       |       |       |       |       |       |       |       |
|--------------------------------|-------|-------|-------|-------|-------|-------|-------|-------|-------|-------|-------|-------|-------|-------|-------|
| CRO                            | 75    | 731   | 10.26 | 88    | 861   | 10.22 | 123   | 1,337 | 9.20  | 163   | 1,770 | 9.21  | 248   | 2,138 | 11.60 |
| CIP                            | 186   | 953   | 19.52 | 110   | 1,072 | 10.26 | 177   | 1,458 | 12.14 | 202   | 2,113 | 9.56  | 172   | 1,970 | 8.73  |
| IPM                            | 1     | 864   | 0.12  | 2     | 897   | 0.22  | 6     | 980   | 0.61  | 6     | 1,196 | 0.50  | 10    | 1,205 | 0.83  |
| AN                             | 63    | 651   | 9.68  | 46    | 780   | 5.90  | 70    | 1,247 | 5.61  | 66    | 1,825 | 3.62  | 77    | 2,055 | 3.75  |
| <i>Acinetobacter baumannii</i> |       |       |       |       |       |       |       |       |       |       |       |       |       |       |       |
| CAZ                            | 150   | 218   | 68.81 | 131   | 193   | 67.88 | 57    | 174   | 32.76 | 46    | 178   | 25.84 | 30    | 141   | 21.28 |
| CIP                            | 150   | 217   | 69.12 | 110   | 197   | 55.84 | 50    | 148   | 33.78 | 21    | 148   | 14.19 | 25    | 147   | 17.01 |
| IPM                            | 66    | 229   | 28.82 | 45    | 199   | 22.61 | 23    | 189   | 12.17 | 21    | 196   | 10.71 | 23    | 185   | 12.43 |
| <i>Pseudomonas aeruginosa</i>  |       |       |       |       |       |       |       |       |       |       |       |       |       |       |       |
| CAZ                            | 797   | 5,688 | 14.01 | 862   | 6,115 | 14.10 | 816   | 6,366 | 12.82 | 1,062 | 7,527 | 14.11 | 837   | 7,562 | 11.07 |
| CIP                            | 1,041 | 4,038 | 25.78 | 1,089 | 4,490 | 24.25 | 1,034 | 5,134 | 20.10 | 1,231 | 6,464 | 19.04 | 1,292 | 7,005 | 18.44 |
| IPM                            | 1,299 | 5,684 | 22.85 | 1,483 | 6,165 | 24.06 | 1,212 | 6,631 | 18.28 | 1,460 | 7,748 | 18.84 | 1,363 | 8,150 | 16.72 |
| <i>Serratia marcescens</i>     |       |       |       |       |       |       |       |       |       |       |       |       |       |       |       |
| CRO                            | 17    | 504   | 3.37  | 46    | 618   | 7.44  | 23    | 671   | 3.43  | 43    | 857   | 5.02  | 53    | 949   | 5.58  |
| CIP                            | 32    | 602   | 5.32  | 45    | 719   | 6.26  | 60    | 753   | 7.97  | 55    | 1,035 | 5.31  | 70    | 1,090 | 6.42  |
| IPM                            | 2     | 495   | 0.40  | 3     | 595   | 0.50  | 1     | 562   | 0.17  | 0     | 700   | 0     | 2     | 672   | 0.29  |
| AN                             | 9     | 334   | 2.69  | 17    | 469   | 3.62  | 23    | 485   | 4.74  | 121   | 770   | 15.71 | 443   | 1,005 | 44.08 |

| <i>Morganella morganii</i>   |     |       |       |       |       |       |       |        |       |       |        |       |       |        |       |
|------------------------------|-----|-------|-------|-------|-------|-------|-------|--------|-------|-------|--------|-------|-------|--------|-------|
| CRO                          | 29  | 590   | 4.92  | 30    | 609   | 4.93  | 69    | 895    | 7.71  | 65    | 1,097  | 5.93  | 75    | 1,223  | 6.13  |
| CIP                          | 104 | 643   | 16.17 | 151   | 683   | 22.11 | 220   | 949    | 23.18 | 229   | 1,270  | 18.03 | 174   | 1,207  | 14.42 |
| IPM                          | 26  | 570   | 4.56  | 53    | 559   | 9.48  | 56    | 609    | 9.20  | 36    | 633    | 5.69  | 60    | 589    | 10.19 |
| AN                           | 8   | 385   | 2.08  | 10    | 471   | 2.12  | 34    | 778    | 4.37  | 42    | 1,073  | 3.91  | 9     | 1,193  | 0.75  |
| <i>Enterococcus faecalis</i> |     |       |       |       |       |       |       |        |       |       |        |       |       |        |       |
| AMX                          | 13  | 3,127 | 0.42  | 12    | 2,488 | 0.48  | 13    | 4,818  | 0.27  | 19    | 7,221  | 0.26  | 21    | 7,648  | 0.27  |
| GM                           | 356 | 2,774 | 12.83 | 454   | 3,437 | 13.21 | 2,053 | 6,036  | 34.01 | 3,972 | 7,848  | 50.61 | 4,215 | 6,446  | 65.39 |
| VA                           | 2   | 2,784 | 0.07  | 1     | 3,442 | 0.03  | 13    | 6,078  | 0.21  | 7     | 8,879  | 0.08  | 11    | 9,147  | 0.12  |
| <i>Enterococcus faecium</i>  |     |       |       |       |       |       |       |        |       |       |        |       |       |        |       |
| AMX                          | 373 | 463   | 80.56 | 336   | 406   | 82.76 | 508   | 633    | 80.25 | 881   | 1,071  | 82.26 | 822   | 991    | 82.95 |
| GM                           | 238 | 462   | 51.52 | 301   | 607   | 49.59 | 325   | 690    | 47.10 | 475   | 923    | 51.46 | 479   | 751    | 63.78 |
| VA                           | 18  | 465   | 3.87  | 23    | 316   | 3.73  | 22    | 707    | 3.11  | 24    | 1,015  | 2.36  | 8     | 950    | 0.84  |
| <i>Staphylococcus aureus</i> |     |       |       |       |       |       |       |        |       |       |        |       |       |        |       |
| OX                           | 897 | 6,363 | 14.10 | 1,360 | 7,739 | 17.57 | 2,164 | 11,352 | 19.06 | 2,127 | 13,135 | 16.19 | 2,251 | 14,612 | 15.41 |
| SXT                          | 66  | 6,261 | 1.05  | 99    | 7,345 | 1.35  | 141   | 10,635 | 1.33  | 105   | 12,452 | 0.84  | 143   | 13,204 | 1.08  |
| VA                           | 1   | 6,242 | 0.02  | 0     | 7,336 | 0     | 1     | 8,925  | 0.01  | 1     | 9,543  | 0.01  | 2     | 9,817  | 0.02  |



| <i>Staphylococcus epidermidis</i> |       |       |       |       |       |       |       |       |       |       |       |       |       |       |       |
|-----------------------------------|-------|-------|-------|-------|-------|-------|-------|-------|-------|-------|-------|-------|-------|-------|-------|
| OX                                | 2,022 | 2,997 | 67.47 | 2,426 | 3,646 | 66.54 | 3,045 | 4,716 | 64.57 | 3,514 | 5,648 | 62.22 | 3,825 | 6,070 | 63.01 |
| SXT                               | 1,129 | 3,010 | 37.51 | 1,413 | 3,649 | 38.72 | 1,729 | 4,747 | 36.42 | 1,926 | 5,652 | 34.08 | 1,995 | 5,879 | 33.93 |
| VA                                | 11    | 3,005 | 0.37  | 7     | 3,650 | 0.19  | 6     | 4,339 | 0.14  | 6     | 4,798 | 0.13  | 2     | 4,890 | 0.04  |
| <i>Streptococcus agalactiae</i>   |       |       |       |       |       |       |       |       |       |       |       |       |       |       |       |
| OX                                | 0     | 1,547 | 0     | 0     | 1,958 | 0     | 0     | 3,246 | 0     | 0     | 4,269 | 0     | 0     | 3,948 | 0     |
| SXT                               | 8     | 426   | 1.88  | 2     | 535   | 0.37  | 155   | 1,307 | 11.86 | 9     | 2,336 | 0.39  | 10    | 1,406 | 0.71  |
| VA                                | 1     | 982   | 0.10  | 0     | 1,267 | 0     | 0     | 2,625 | 0     | 1     | 3,469 | 0.03  | 0     | 3,381 | 0     |

AMX: Amoxicillin; AMC: Amoxicillin-clavulanic acid; AN: Amikacin; CRO: Ceftriaxone; CAZ: Ceftazidime; CIP: Ciprofloxacin; GM: Gentamicin; IPM: Imipenem; OX: Oxacillin; SXT: Cotrimoxazole; VA: Vancomycin

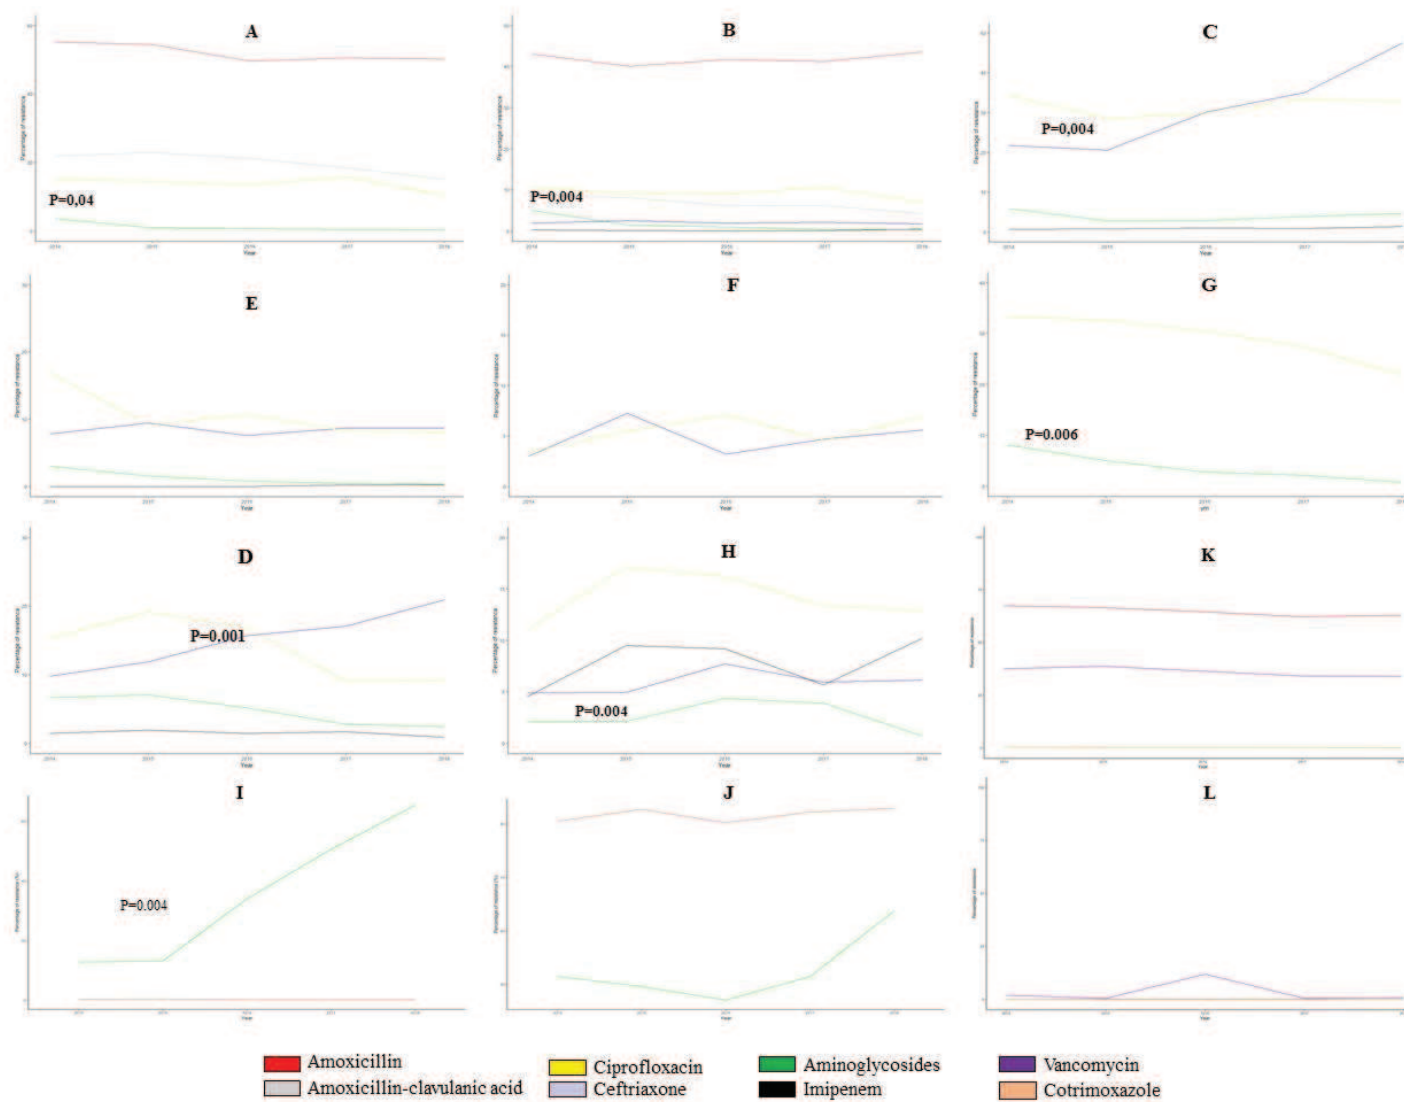

Figure S1. Evolution of resistance percentage of key antibiotics in bacterial species isolated by the different laboratories included in our study from January 2014 to December 2018. **A.** *E. coli*; **B.** *P. mirabilis*; **C.** *E. cloacae*; **D.** *E. aerogenes*; **E.** *K. oxytoca*; **F.** *S. marcescens*; **G.** *K. pneumoniae*; **H.** *M. morgani*; **I.** *E. faecalis*; **J.** *E. faecium*; **K.** *S. epidermidis*; **L.** *S. agalactiae*

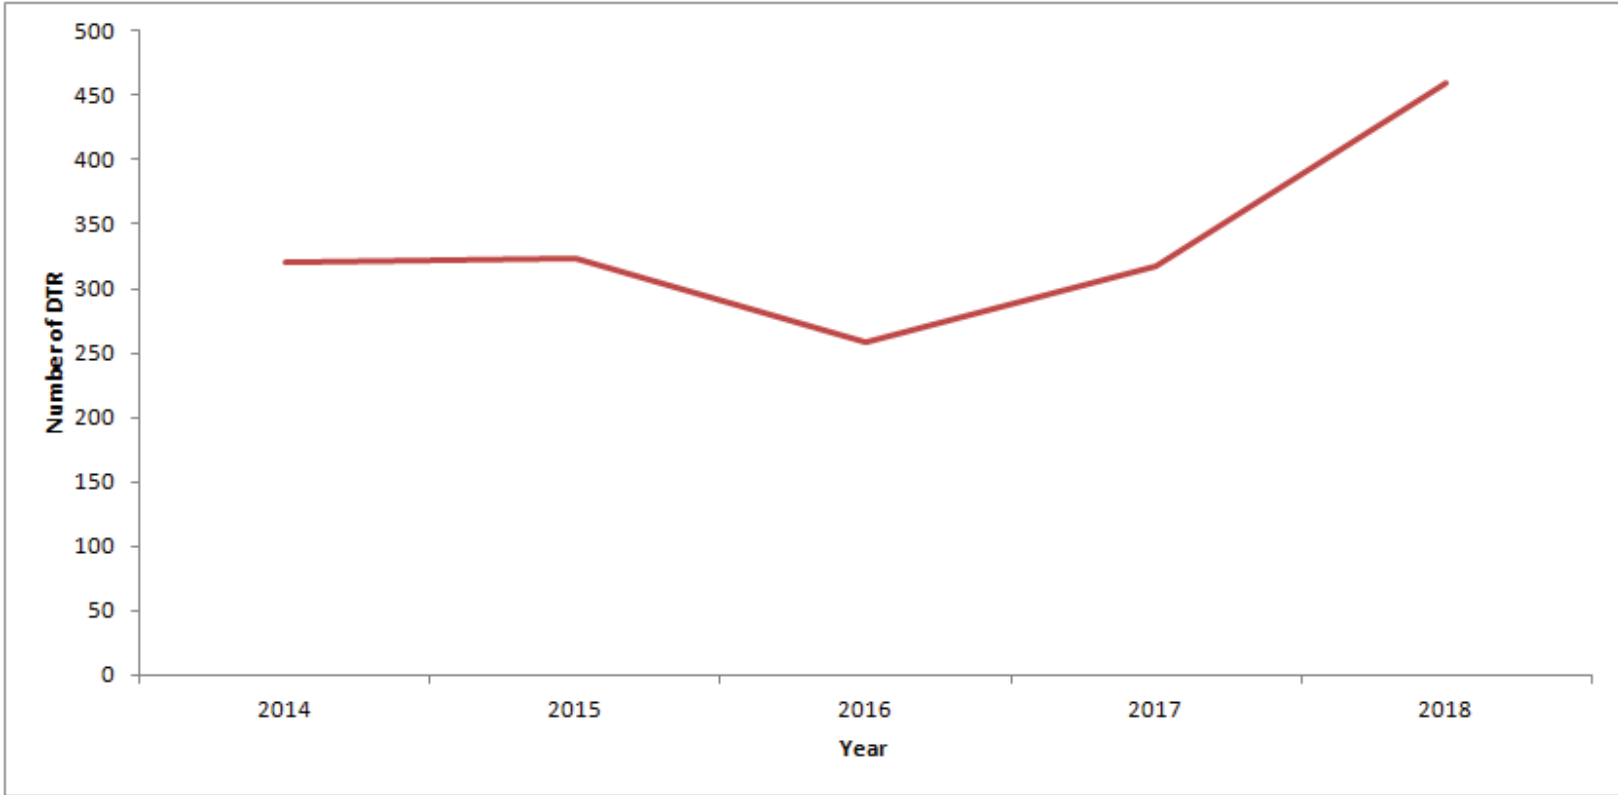

Figure S2. Evolution of the number of strains carrying a DTR phenotype between 2014 and 2018.

Figure S2.
